# Supplementary material
Source: PubMed Central journal article supplement (PMC3755963)
Supplement: NIHMS494968-supplement-supplement_1.pdf [file NIHMS494968-supplement-supplement_1.pdf]

## Supplemental Box

One method to understand feedback is to “break the loop,” turning the closed-loop feedback system into one with a defined input and output. In the resulting open-loop system, the output would feed back into the input. In the following system, we break the loop in a system with an output  $y$  that feeds back into  $x$ :

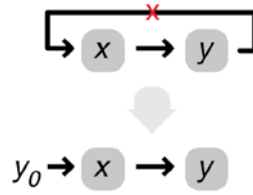

We can then measure the sign and strength of the now-broken feedback loop with the concept of sensitivity: how much the output  $y$  changes for a small change in the input ( $y_0$ ). In this particular case, the sensitivity is called an open-loop gain because it measures the gain (or how much  $y$  changes with respect to changes in  $y_0$ ) of the open-loop form of the closed-loop system. Mathematically, sensitivity of  $y$  to changes in the point of feedback

regulation ( $y_0$ ) at a given steady state ( $\hat{x}, \hat{y}$ ) is calculated with the formula  $\gamma = \left. \frac{\partial y}{\partial y_0} \right|_{y_0 = \hat{y}}$ . The sign of  $\gamma$  tells us the

sign of feedback. Note that the sign of feedback may not be obvious, and may emerge from complex interactions in the network that connects  $x$  to  $y$ .

For instance, we can find the open-loop gain in a simple mathematical model of a two-component system (Figure 1), by defining mathematical forms with one or more rate constant for each process embedded in the system. Sparing the details of computation, we found that  $\gamma$  is proportional to  $k_{pt}k_d - k_{ph}k_e$  where  $k_{pt}$  and  $k_{ph}$  are respective rates of regulator phosphorylation and dephosphorylation by the sensor,  $k_d$  is the rate of dilution from growth, and  $k_e$  is the rate parameter for exogenous phosphorylation. This simple relationship between the gain and rate constants tells us several things about transcriptional feedback in two-component systems:

- (i) regulator dephosphorylation and exogenous phosphorylation are both necessary for negative feedback and thus overshoot kinetics;
- (ii) because the dilution rate  $k_d$  is small even for fast exponential growth, the rate of exogenous phosphorylation can be small and still permit negative feedback;
- (iii) different magnitudes of external signaling that modulate phosphorylation and dephosphorylation of the regulator via the sensor ( $k_{pt}$  or  $k_{ph}$ ) can result in different effective feedback signs.

If the circuit diagram of a network (Box 2) has only unambiguously *positive* feedback loops, and its open-loop form has a single steady state, breaking the loop can determine if the intact system is bistable<sup>47</sup>. The basic idea is to use the open-loop form of the system to quantify  $y$  at steady state as a function of  $y_0$ . We denote this

function, the open-loop characteristic curve, by  $f(y_0)$ . Then graph  $y = f(y_0)$  along with the feedback strength of the system (*i.e.* open-loop gain, here for simplicity  $y_0 = y$ ) and look for intersections:

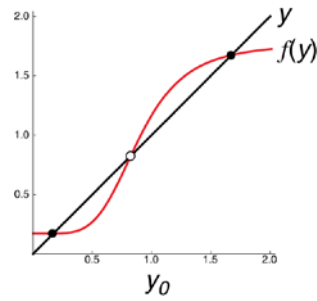

If the system is bistable as in the graph above, the system will have two stable steady states (black points) and one unstable (open circle).
